# Supplementary material
Source: PubMed Central journal article supplement (PMC2810344)
Supplement: NIHMS166865-supplement-Supp1.pdf [file NIHMS166865-supplement-Supp1.pdf]

**SUPPLEMENTAL MATERIAL**

**SUPPLEMENTAL TABLES**

**Supplementary Table 1 Genotyped candidate genes and SNP totals**

| <b>Gene</b> | <b>Chromosome</b> | <b>Total SNPs genotyped</b> | <b>No. SNPs genotyped in CG1 panel</b> | <b>No. SNPs genotyped in CG2 panel</b> |
|-------------|-------------------|-----------------------------|----------------------------------------|----------------------------------------|
| ABCA1       | 9                 | 6                           | 2                                      | 4                                      |
| ABCA4       | 1                 | 43                          | 0                                      | 43                                     |
| ABCC1       | 16                | 27                          | 27                                     | 0                                      |
| ABCG1       | 21                | 40                          | 40                                     | 0                                      |
| ABCG4       | 11                | 5                           | 0                                      | 5                                      |
| ACE         | 17                | 26                          | 26                                     | 0                                      |
| ACTA1       | 1                 | 4                           | 0                                      | 4                                      |
| ADH1B       | 4                 | 2                           | 0                                      | 2                                      |
| ADH1C       | 4                 | 2                           | 0                                      | 2                                      |
| ADIPOQ      | 3                 | 13                          | 13                                     | 0                                      |
| ADIPOR1     | 1                 | 9                           | 0                                      | 9                                      |
| ADORA2A     | 22                | 14                          | 14                                     | 0                                      |
| ADORA2B     | 17                | 11                          | 11                                     | 0                                      |
| ADRB2       | 5                 | 8                           | 4                                      | 4                                      |
| AGER        | 6                 | 7                           | 2                                      | 5                                      |
| AGT         | 1                 | 11                          | 11                                     | 0                                      |
| AGTR1       | 3                 | 16                          | 16                                     | 0                                      |
| AGTR2       | X                 | 8                           | 8                                      | 0                                      |
| AIMs        | -                 | 209                         | 97                                     | 112                                    |
| AKT1        | 14                | 16                          | 0                                      | 16                                     |
| ALDH2       | 12                | 1                           | 0                                      | 1                                      |
| ALOX12      | 17                | 15                          | 15                                     | 0                                      |
| ALOX15      | 17                | 13                          | 13                                     | 0                                      |
| ALOX5       | 10                | 19                          | 19                                     | 0                                      |
| ALOX5AP     | 13                | 17                          | 17                                     | 0                                      |
| AMPD1       | 1                 | 11                          | 11                                     | 0                                      |
| AMPD2       | 1                 | 6                           | 6                                      | 0                                      |
| APCS        | 1                 | 5                           | 5                                      | 0                                      |
| APOA1       | 11                | 2                           | 0                                      | 2                                      |
| APOA2       | 1                 | 5                           | 0                                      | 5                                      |
| APOA4       | 11                | 4                           | 0                                      | 4                                      |

|         |    |    |    |    |
|---------|----|----|----|----|
| APOA5   | 11 | 20 | 0  | 20 |
| APOB    | 2  | 13 | 0  | 13 |
| APOC2   | 19 | 2  | 0  | 2  |
| APOC3   | 11 | 4  | 0  | 4  |
| APOE    | 19 | 7  | 7  | 0  |
| ARMS2   | 10 | 7  | 0  | 7  |
| ATG9B   | 7  | 3  | 3  | 0  |
| BHMT    | 5  | 6  | 6  | 0  |
| BHMT2   | 5  | 5  | 5  | 0  |
| C2      | 6  | 19 | 0  | 19 |
| C3      | 19 | 3  | 3  | 0  |
| C5      | 9  | 26 | 0  | 26 |
| CACNA1H | 16 | 10 | 0  | 10 |
| CANT1   | 17 | 1  | 0  | 1  |
| CAPN10  | 2  | 12 | 11 | 1  |
| CAPN5   | 11 | 14 | 0  | 14 |
| CAV1    | 7  | 15 | 0  | 15 |
| CAV2    | 7  | 13 | 0  | 13 |
| CBS     | 21 | 15 | 15 | 0  |
| CCL11   | 17 | 4  | 0  | 4  |
| CCL2    | 17 | 18 | 18 | 0  |
| CD14    | 5  | 11 | 0  | 11 |
| CD36    | 7  | 10 | 10 | 0  |
| CD40    | 20 | 7  | 0  | 7  |
| CD40LG  | X  | 12 | 12 | 0  |
| CEL     | 9  | 3  | 0  | 3  |
| CETP    | 16 | 9  | 6  | 3  |
| CFH     | 1  | 27 | 26 | 1  |
| CHUK    | 10 | 8  | 0  | 8  |
| COL4A1  | 13 | 22 | 0  | 22 |
| CRP     | 1  | 14 | 10 | 4  |
| CTH     | 1  | 10 | 10 | 0  |
| CYP11B2 | 8  | 15 | 15 | 0  |
| CYP1A1  | 15 | 5  | 0  | 5  |
| CYP2E1  | 10 | 2  | 0  | 2  |
| DMPK    | 19 | 8  | 0  | 8  |
| EDG1    | 1  | 10 | 10 | 0  |
| EDG5    | 19 | 8  | 8  | 0  |
| EDN1    | 6  | 4  | 4  | 0  |
| EFEMP1  | 2  | 25 | 0  | 25 |
| ELN     | 7  | 9  | 0  | 9  |

|        |    |    |    |    |
|--------|----|----|----|----|
| ERCC6  | 10 | 14 | 0  | 14 |
| ESR1   | 6  | 44 | 44 | 0  |
| ESR2   | 14 | 12 | 12 | 0  |
| F13A1  | 6  | 22 | 22 | 0  |
| F13B   | 1  | 16 | 16 | 0  |
| F2     | 11 | 7  | 7  | 0  |
| F5     | 1  | 15 | 15 | 0  |
| FABP2  | 4  | 4  | 4  | 0  |
| FBLN5  | 14 | 32 | 0  | 32 |
| FEM1A  | 19 | 4  | 0  | 4  |
| FEM1B  | 15 | 10 | 0  | 10 |
| FGA    | 4  | 4  | 4  | 0  |
| FGB    | 4  | 10 | 10 | 0  |
| FGG    | 4  | 6  | 6  | 0  |
| FOXO1  | 13 | 24 | 0  | 24 |
| GCG    | 2  | 9  | 0  | 9  |
| GCK    | 7  | 24 | 15 | 9  |
| GNAS   | 20 | 15 | 15 | 0  |
| GNB3   | 12 | 2  | 0  | 2  |
| GPR132 | 14 | 4  | 4  | 0  |
| GRK4   | 4  | 23 | 23 | 0  |
| GSTM1  | 1  | 8  | 0  | 8  |
| GSTP1  | 11 | 13 | 0  | 13 |
| GSTT1  | 22 | 9  | 0  | 9  |
| HMCN1  | 1  | 27 | 0  | 27 |
| HMGCR  | 5  | 10 | 10 | 0  |
| HNF4A  | 20 | 10 | 10 | 0  |
| HTRA1  | 10 | 3  | 0  | 3  |
| ICAM1  | 19 | 13 | 13 | 0  |
| ID3    | 1  | 7  | 0  | 7  |
| IFNG   | 12 | 4  | 4  | 0  |
| IFNGR1 | 6  | 11 | 11 | 0  |
| IFNGR2 | 21 | 6  | 6  | 0  |
| IGF1   | 12 | 17 | 17 | 0  |
| IGF2   | 11 | 17 | 7  | 10 |
| IGF2AS | 11 | 2  | 2  | 0  |
| IGFBP1 | 7  | 11 | 0  | 11 |
| IGFBP2 | 2  | 18 | 0  | 18 |
| IGFBP3 | 7  | 8  | 0  | 8  |
| IKBKG  | X  | 3  | 0  | 3  |
| IL10   | 1  | 7  | 7  | 0  |

|        |    |    |    |    |
|--------|----|----|----|----|
| IL13   | 5  | 11 | 0  | 11 |
| IL1A   | 2  | 5  | 0  | 5  |
| IL1B   | 2  | 11 | 11 | 0  |
| IL1R1  | 2  | 13 | 0  | 13 |
| IL1R2  | 2  | 10 | 0  | 10 |
| IL1RN  | 2  | 4  | 0  | 4  |
| IL4    | 5  | 3  | 3  | 0  |
| IL6    | 7  | 8  | 8  | 0  |
| IL8    | 4  | 7  | 0  | 7  |
| INSIG2 | 2  | 12 | 0  | 12 |
| INSR   | 19 | 17 | 17 | 0  |
| IRAK1  | X  | 8  | 8  | 0  |
| KCNK1  | 1  | 27 | 0  | 27 |
| KCNK2  | 1  | 60 | 0  | 60 |
| LCAT   | 16 | 7  | 0  | 7  |
| LDLR   | 19 | 13 | 13 | 0  |
| LIPG   | 18 | 1  | 0  | 1  |
| LMNA   | 1  | 7  | 0  | 7  |
| LPA    | 6  | 14 | 14 | 0  |
| LPL    | 8  | 46 | 27 | 19 |
| LRP1   | 12 | 15 | 15 | 0  |
| LRP5   | 11 | 40 | 0  | 40 |
| LTA    | 6  | 14 | 14 | 0  |
| LTB    | 6  | 2  | 2  | 0  |
| MASP2  | 1  | 6  | 0  | 6  |
| MBL2   | 10 | 6  | 0  | 6  |
| MME    | 3  | 30 | 0  | 30 |
| MMP3   | 11 | 10 | 10 | 0  |
| MRPL10 | 17 | 1  | 1  | 0  |
| MS4A2  | 11 | 12 | 0  | 12 |
| MSH3   | 5  | 1  | 0  | 1  |
| MTHFR  | 1  | 10 | 10 | 0  |
| MTR    | 1  | 21 | 21 | 0  |
| MTRR   | 5  | 8  | 8  | 0  |
| MYO7A  | 11 | 2  | 0  | 2  |
| NCF1   | 7  | 2  | 0  | 2  |
| NFE2L2 | 2  | 12 | 0  | 12 |
| NFKB1  | 4  | 19 | 19 | 0  |
| NFKB2  | 10 | 7  | 0  | 7  |
| NFKBIA | 14 | 12 | 10 | 2  |
| NFKBIB | 19 | 11 | 11 | 0  |

|         |    |    |    |    |
|---------|----|----|----|----|
| NFKBIE  | 6  | 7  | 0  | 7  |
| NOS1AP  | 1  | 28 | 0  | 28 |
| NOS3    | 7  | 14 | 14 | 0  |
| NPPA    | 1  | 5  | 0  | 5  |
| NR1H2   | 19 | 6  | 0  | 6  |
| NR1H4   | 12 | 22 | 0  | 22 |
| NR3C1   | 5  | 11 | 11 | 0  |
| OLFML2B | 1  | 7  | 0  | 7  |
| OLR1    | 12 | 8  | 8  | 0  |
| PAX6    | 11 | 6  | 6  | 0  |
| PCSK9   | 1  | 16 | 0  | 16 |
| PDE4D   | 5  | 40 | 40 | 0  |
| PDYN    | 20 | 1  | 0  | 1  |
| PLA2G7  | 6  | 17 | 0  | 17 |
| PLAT    | 8  | 8  | 8  | 0  |
| PLEKHA1 | 10 | 16 | 0  | 16 |
| PLTP    | 20 | 9  | 0  | 9  |
| PON1    | 7  | 19 | 19 | 0  |
| PON2    | 7  | 10 | 10 | 0  |
| PON3    | 7  | 8  | 8  | 0  |
| PPARA   | 22 | 28 | 0  | 28 |
| PPARD   | 6  | 15 | 0  | 15 |
| PPARG   | 3  | 38 | 38 | 0  |
| PPARGC1 | 4  | 35 | 0  | 35 |
| PRKAA1  | 5  | 9  | 0  | 9  |
| PRKAA2  | 1  | 18 | 18 | 0  |
| PRKAB1  | 12 | 8  | 0  | 8  |
| PRKAB2  | 1  | 11 | 0  | 11 |
| PRKAG1  | 12 | 2  | 0  | 2  |
| PRKAG2  | 7  | 17 | 0  | 17 |
| PRKAG3  | 2  | 7  | 0  | 7  |
| PTGS1   | 9  | 15 | 15 | 0  |
| PTGS2   | 1  | 8  | 8  | 0  |
| PTPN1   | 20 | 28 | 28 | 0  |
| RETN    | 19 | 5  | 0  | 5  |
| RGS2    | 1  | 2  | 0  | 2  |
| RGS9    | 17 | 10 | 10 | 0  |
| RGS9BP  | 19 | 6  | 6  | 0  |
| SCAP    | 3  | 11 | 0  | 11 |
| SCARB1  | 12 | 43 | 0  | 43 |
| SCNN1A  | 12 | 10 | 10 | 0  |

|          |    |    |    |    |
|----------|----|----|----|----|
| SCNN1B   | 16 | 13 | 13 | 0  |
| SCNN1G   | 16 | 9  | 9  | 0  |
| SELE     | 1  | 9  | 9  | 0  |
| SELL     | 1  | 2  | 2  | 0  |
| SELP     | 1  | 13 | 13 | 0  |
| SELS     | 15 | 8  | 0  | 8  |
| SERPINA1 | 14 | 11 | 11 | 0  |
| SERPINE1 | 7  | 9  | 9  | 0  |
| SLC2A1   | 1  | 19 | 0  | 19 |
| SLC2A4   | 17 | 8  | 0  | 8  |
| SOD2     | 6  | 6  | 0  | 6  |
| SOD3     | 4  | 4  | 4  | 0  |
| SORCS1   | 10 | 5  | 5  | 0  |
| SREBF1   | 17 | 6  | 0  | 6  |
| SREBF2   | 22 | 30 | 0  | 30 |
| TCF7L2   | 10 | 66 | 0  | 66 |
| TCN1     | 11 | 3  | 3  | 0  |
| TCN2     | 22 | 18 | 18 | 0  |
| THBD     | 20 | 7  | 7  | 0  |
| TLR2     | 4  | 9  | 9  | 0  |
| TLR4     | 9  | 14 | 14 | 0  |
| TLR7     | X  | 6  | 6  | 0  |
| TLR9     | 3  | 5  | 5  | 0  |
| TNF      | 6  | 6  | 6  | 0  |
| TNFAIP3  | 6  | 14 | 0  | 14 |
| TNFRSF1A | 12 | 16 | 16 | 0  |
| TPO      | 2  | 1  | 0  | 1  |
| UCP1     | 4  | 14 | 0  | 14 |
| UCP2     | 11 | 10 | 0  | 10 |
| UCP3     | 11 | 7  | 0  | 7  |
| VCAM1    | 1  | 17 | 17 | 0  |
| VEGFA    | 6  | 13 | 11 | 2  |
| VEGFB    | 11 | 1  | 1  | 0  |
| VKORC1   | 16 | 1  | 0  | 1  |
| VWF      | 12 | 49 | 49 | 0  |
| WRN      | 8  | 16 | 0  | 16 |
| WWTR1    | 3  | 1  | 0  | 1  |

---

**Supplementary Table 2 Variables with log Bayes Factors > 0**

| Rank | Variable                             | Log Bayes Factor | Chromosome |
|------|--------------------------------------|------------------|------------|
| 1    | Age                                  | 49.45            | -          |
| 2    | Sex                                  | 22.48            | -          |
| 3    | rs2380316                            | 13.63            | X          |
| 4    | rs1716758                            | 12.99            | X          |
| 5    | Diabetes                             | 8.33             | -          |
| 6    | rs1011526                            | 7.58             | X          |
| 7    | rs760866                             | 7.26             | X          |
| 8    | rs179016                             | 7.01             | X          |
| 9    | rs953114                             | 6.57             | X          |
| 10   | rs1935074                            | 6.17             | X          |
| 11   | Systolic blood pressure (mmHg)       | 6.02             | -          |
| 12   | rs525869                             | 5.82             | X          |
| 13   | rs179012                             | 5.67             | X          |
| 14   | Hypertension (JNCVI)                 | 5.45             | -          |
| 15   | rs1558022                            | 4.52             | X          |
| 16   | rs1152324                            | 4.33             | X          |
| 17   | rs1277959                            | 4.26             | X          |
| 18   | rs1882719                            | 4.12             | X          |
| 19   | rs980099                             | 4.02             | X          |
| 20   | rs734329                             | 4.01             | X          |
| 21   | rs179019                             | 3.67             | X          |
| 22   | HDL Cholesterol (mg/dl)              | 2.90             | -          |
| 23   | Smoking                              | 2.63             | -          |
| 24   | rs6608590                            | 2.6              | X          |
| 25   | rs4681443                            | 2.52             | 3          |
| 26   | rs916055                             | 2.26             | 17         |
| 27   | rs718858                             | 2.23             | 3          |
| 28   | rs179009                             | 2.02             | X          |
| 29   | Body Mass Index (kg/m <sup>2</sup> ) | 1.99             | -          |
| 30   | rs1035941                            | 1.55             | 19         |
| 31   | rs2200290                            | 1.47             | X          |
| 32   | rs1403543                            | 1.44             | X          |
| 33   | rs2695                               | 1.43             | 9          |
| 34   | rs5741880                            | 1.4              | X          |
| 35   | rs278145                             | 1.3              | 12         |
| 36   | rs1978240                            | 1.25             | X          |
| 37   | rs4851526                            | 1.22             | 2          |

|    |                       |      |    |
|----|-----------------------|------|----|
| 38 | rs4076107             | 1.15 | X  |
| 39 | rs762656              | 1.02 | X  |
| 40 | rs1952586             | 0.91 | 14 |
| 41 | rs11691240            | 0.84 | 2  |
| 42 | rs7061789             | 0.75 | X  |
| 43 | rs278143              | 0.63 | 12 |
| 44 | rs278148              | 0.63 | 12 |
| 45 | rs278152              | 0.63 | 12 |
| 46 | (LDL/HDL) Cholesterol | 0.61 | -  |
| 47 | rs633                 | 0.52 | X  |
| 48 | rs701203              | 0.38 | 1  |
| 49 | rs4213                | 0.31 | 12 |
| 50 | rs12432450            | 0.30 | 14 |
| 51 | rs1800206             | 0.24 | 22 |
| 52 | Education             | 0.21 | -  |
| 53 | rs2498852             | 0.20 | 14 |
| 54 | rs699946              | 0.20 | 6  |
| 55 | rs3027898             | 0.06 | X  |
| 56 | rs1867024             | 0.05 | X  |
| 57 | rs854542              | 0.05 | 7  |
| 58 | rs7756935             | 0.04 | 6  |
| 59 | rs6502804             | 0.02 | 17 |
